# Supplementary material
Source: PubMed Central journal article supplement (PMC1323209)
Supplement: pnas_0509603102_3.pdf [file pnas_0509603102_3.pdf]

**Table 2. Clinical information on 20 PTC cases**

| <b>Sample Name</b> | <b>Age at diagnosis</b> | <b>Gender</b> | <b>Race</b> | <b>Diagnosis</b>                           | <b>Tumor Stage*</b> | <b>Multifocal?</b> |
|--------------------|-------------------------|---------------|-------------|--------------------------------------------|---------------------|--------------------|
| PTC1               | 48                      | F             | Caucasian   | PTC                                        | T3N1bMx             | N                  |
| PTC2               | 42                      | M             | Caucasian   | PTC                                        | T3NxMx              | N                  |
| PTC3               | 43                      | M             | Caucasian   | PTC                                        | T2NxMx              | Y                  |
| PTC4               | 33                      | M             | unknown     | fvPTC                                      | T1N0MX              | Y                  |
| PTC5               | 43                      | F             | Caucasian   | fvPTC                                      | T1N1aMx             | N                  |
| PTC6               | 56                      | M             | Caucasian   | PTC                                        | T4N0M1              | Y                  |
| PTC7               | 36                      | M             | Caucasian   | PTC                                        | T4aN1aM1            | N                  |
| PTC8               | 65                      | F             | unknown     | fvPTC                                      | T2NxMx              | Y                  |
| PTC9               | 31                      | F             | Caucasian   | PTC                                        | T4aN1bMx            | N                  |
| PTC10              | 45                      | F             | Caucasian   | fvPTC                                      | T1NxMx              | Y                  |
| PTC11              | 55                      | F             | Caucasian   | PTC                                        | T2NxMx              | Y                  |
| PTC12              | 61                      | M             | Caucasian   | fvPTC                                      | T3NxMx              | Y                  |
| PTC13              | 13                      | F             | Caucasian   | PTC                                        | T1N1Mx              | N                  |
| PTC14              | 59                      | M             | Caucasian   | HCC with follicular and papillary features | T2NxMx              | N                  |
| PTC15              | 45                      | F             | Caucasian   | PTC                                        | T1NxMx              | N                  |
| PTC16              | 26                      | F             | Caucasian   | PTC                                        | T1N1aMx             | N                  |
| PTC17              | 41                      | F             | unknown     | PTC                                        | T1NxMx              | N                  |
| PTC18              | 53                      | F             | Caucasian   | PTC                                        | T1NxMx              | Y                  |
| PTC19              | 60                      | F             | Caucasian   | PTC                                        | T2NxMx              | Y                  |
| PTC20              | 33                      | M             | Caucasian   | PTC                                        | T2N1Mx              | Y                  |

fvPTC - papillary thyroid carcinoma, follicular variant; HCC - Hurthle Cell carcinoma. All matched tumor and normal tissue samples were procured during the same surgical procedure. Histologic classification on all cases with the exception of PTC4, PTC8 and PTC10 was performed by a single pathologist (S.S.).

\*Greene, F. L., Page, D. L., Fleming, I. D., Fritz, A. G., Balch, C. M., Haller, D. G. & Morrow, M. (2002) *AJCC Cancer Staging Manual* (Springer, New York), 6th Ed.
